# 1 **Fascioliasis in north-central Vietnam: assessing community** 2 **knowledge, attitudes, and practices**

3 Vinh Hoang Quang<sup>1,2,3,4</sup>, Bruno Levecke<sup>2</sup>, Dung Do Trung<sup>1</sup>, Binh Vu Thi Lam<sup>1</sup>, Le Thuy Dung<sup>1</sup>,  
4 Nguyen Duc Thuy<sup>1</sup>, Tran Thi Tuyen<sup>1</sup>, Nguyen Thi Thu Hien<sup>1</sup>, Nguyen Ngoc Ha<sup>1</sup>, Brecht  
5 Devleeschauwer<sup>2,5</sup>, Kathy Goossens<sup>3</sup>, Theodorus de Jong<sup>3</sup>, Linda Paredis<sup>3</sup>, Katja Polman<sup>6</sup>, Steven  
6 Callens<sup>4</sup>, Pierre Dorny<sup>2,3</sup>, Veronique Dermauw<sup>3\*</sup>

7 <sup>1</sup>Department of Parasitology, National Institute of Malariology, Parasitology and Entomology,  
8 Hanoi, Vietnam

9 <sup>2</sup>Department of Translational Physiology, Infectiology and Public Health, Ghent University,  
10 Merelbeke, Belgium

11 <sup>3</sup>Department of Biomedical Sciences, Institute of Tropical Medicine, Antwerp, Belgium

12 <sup>4</sup>Department of Internal Medicine and Pediatrics, Faculty of Medicine and Health Sciences, Ghent  
13 University, Ghent, Belgium

14 <sup>5</sup>Department of Epidemiology and Public Health, Sciensano, Brussels, Belgium

15 <sup>6</sup>Department of Public Health, Institute of Tropical Medicine, Antwerp, Belgium

16 \*Corresponding author: [vdermauw@itg.be](mailto:vdermauw@itg.be)

## 17 **Abstract**

18 **Background:** Fascioliasis, caused by *Fasciola hepatica* and *Fasciola gigantica*, is a zoonotic  
19 disease that significantly impacts public health in agricultural communities, particularly in Vietnam.  
20 This study aims to assess the knowledge, attitudes, and practices (KAP) regarding fascioliasis  
21 among residents in a rural community in Vietnam.

22 **Methodology/Principal Findings:** A cross-sectional study was conducted in Dong Thanh  
23 commune, north-central Vietnam. A random sample of 621 households was selected, and 1,398  
24 individuals participated in this study. All participants were interviewed for individual KAP to assess  
25 KAP regarding fascioliasis. In contrast, household heads were also interviewed about household  
26 practices, including life cycle knowledge, health-seeking behavior, water and sanitation practices,  
27 livestock and crop management, and dietary habits. Descriptive statistics were used to assess KAP,  
28 and generalized linear models were applied to examine the associations between socio-demographic  
29 variables and KAP. Awareness of fascioliasis was low, with 85% (1,193/1,398) of respondents  
30 reporting no prior knowledge. Detailed understanding of transmission, symptoms, and prevention  
31 was limited. Only 9% (124/1,398) of participants could accurately identify the symptoms, while  
32 12% (168/1,398) were knowledgeable about preventive measures. A high percentage of households  
33 treated drinking water (99%, 613/619), and consumption of raw vegetables was widespread, with  
34 93% (1,083/1,168) of individuals and 95% of households reporting this practice. Males were less  
35 likely to engage in non-risky practices than females (odds ratio: 0.696; 95% confidence interval:  
36 0.591-0.819). Most households (85%, 522/617) sourced plants from their parcels, and 67%  
37 (395/588) used animal manure as fertilizer.

38 **Conclusion/Significance:** The study reveals significant gaps in knowledge, attitudes, and practices  
39 related to fascioliasis in Dong Thanh commune. There is a pressing need for targeted educational

40 programs to enhance community awareness and promote safer practices to mitigate the risk of  
41 fascioliasis transmission. Future interventions should emphasize gender-specific education and  
42 broader community involvement to address these gaps effectively.

## 43 **Author Summary**

44 Fascioliasis, caused by *Fasciola hepatica* and *Fasciola gigantica*, is a zoonotic foodborne disease  
45 emerging in Vietnam. This study investigates the knowledge, attitudes, and practices (KAP) related  
46 to fascioliasis among residents of a commune in north-central Vietnam, where the disease is highly  
47 prevalent in livestock. A cross-sectional survey of 1,398 individuals and 621 households assessed  
48 life cycle knowledge, health-seeking behaviors, dietary habits, water and sanitation practices, and  
49 management of both livestock and crops. The results show that 85% of respondents were unaware  
50 of fascioliasis, with inadequate knowledge about its transmission, symptoms, and prevention. Water  
51 treatment is commonly practiced, but consumption of raw vegetables persists. Socio-demographic  
52 factors, especially gender, males more likely to engage in risky practices. The findings highlight  
53 critical gaps in KAP, emphasizing the need for targeted education to improve awareness and  
54 promote safer practices, incorporating gender-specific strategies and community engagement.

## 55 **1. Introduction**

56 Fascioliasis is an ubiquitous parasitic disease caused by the liver flukes *Fasciola hepatica*  
57 and *Fasciola gigantica* [1]. It primarily affects ruminants causing economic losses due to  
58 significant reductions in milk and meat production [2-5]. Fascioliasis represents a significant  
59 public health concern due to its substantial health risks to humans [6, 7]. The World Health  
60 Organization (WHO) classifies fascioliasis as a neglected tropical disease, with approximately  
61 50 million individuals infected globally and about 180 million at risk [8]. During the last  
62 decades, fascioliasis has become an emerging public health problem in many areas of the world,  
63 with an estimated annual loss of 35,000 disability adjusted life years [9]. The disease is acquired  
64 through ingesting water or plants contaminated with metacercariae, the parasite's infective stage,  
65 which thrives in environments where human and livestock activities intersect [10].

66 The northern and central regions of Vietnam are highly endemic for both animal and  
67 human fascioliasis [11, 12]. Traditional practices, such as the consumption of raw aquatic plants,  
68 facilitate the transmission of the disease to humans [11, 13]. In a comprehensive study by De et  
69 al., which analyzed over 53,000 cases of fascioliasis in Vietnam from 1995 to 2019, a notable  
70 upward trend in the incidence of the disease was observed. The study documented a rise in the  
71 number of cases from a mere two cases reported in 1995 to a peak of 4,026 cases identified in  
72 2019 [12].

73 In 2020, the General Statistics Office of Vietnam estimated the population of cattle and  
74 buffalos at 6.23 and 2.33 million, respectively [14]. In Vietnam, cattle and buffalos are typically  
75 managed by small-scale farmers, each maintaining herds of fewer than 30 animals [15],  
76 allowing them to freely graze in fields [11]. This practice significantly elevates the risk of  
77 infection among these animals, as they are exposed to contaminated environments for the  
78 majority of the year [16]. The prevalence of fascioliasis in livestock is high, especially in the

79 Red River Delta area and in Central Vietnam, with infection rates in livestock reaching up to  
80 72% [17].

81 Despite the clear public health significance of fascioliasis, there is limited information on  
82 the community knowledge, attitudes, and practices (KAP) regarding the disease in Vietnam.  
83 Understanding these factors is crucial for designing effective intervention strategies. Studies in  
84 Iran have shown that awareness and knowledge of fascioliasis are often low in affected  
85 communities, leading to behaviors that increase the risk of infection, such as the consumption of  
86 raw or improperly treated vegetables and untreated water [18]. Moreover, the utilization of  
87 livestock feces as fertilizer and the climatic conditions favoring the presence of suitable snail  
88 hosts further perpetuate the persistence and transmission of the disease [1, 19]. Previous  
89 research highlighted the critical role of health education and community engagement in  
90 controlling zoonotic diseases [17, 20]. Given the rising number of documented fascioliasis cases  
91 [12] and the existing gap in comprehensive studies on the disease's epidemiology and control,  
92 this study aims to evaluate the KAP related to fascioliasis among residents of Dong Thanh, a  
93 commune in Nghe An province (north-central Vietnam).

## 94 **2. Methods**

### 95 **2.1. Ethics statement**

96 This study was approved by the institutional review boards of both the National Institute  
97 of Malariology, Parasitology, and Entomology (NIMPE) in Vietnam (Approval No. 02-  
98 2022/HDDD) and the Ghent University Hospital/Faculty of Medicine and Health Sciences,  
99 Ghent University in Belgium (Approval No. BC-08915). Prior to commencing the fieldwork, the  
100 study's aims and procedures were communicated to provincial and district health officers, as  
101 well as the Dong Thanh Commune People's Committee, which included medical doctors and  
102 veterinarians. These local authorities subsequently granted their approval for the study. During  
103 the initial visit, detailed information about the study's objectives and procedures was provided to  
104 all participants. Signed informed consent was obtained from each participant aged 18 years and  
105 older before they were enrolled in the study. For minors (i.e., participants between 5 and 1 years  
106 old), verbal assent was solicited and written informed consent was secured from their parents or  
107 guardians.

### 108 **2.2. Study site**

109 This study was conducted in Dong Thanh commune in Yen Thanh district, Nghe An  
110 province in north-central Vietnam (**Figure 1**). As of March 2022, this commune has 8,490  
111 registered habitants across 2,036 households. The main occupation of the residents is farming.  
112 The selection of this study site was based on (i) historical data on the presence of human  
113 fascioliasis, (ii) culinary behaviors that favor disease transmission (e.g. consumption of raw  
114 vegetables), (iii) the presence of both cattle and buffalos that have access to crop fields, and (iv)  
115 the accessibility of the study site.

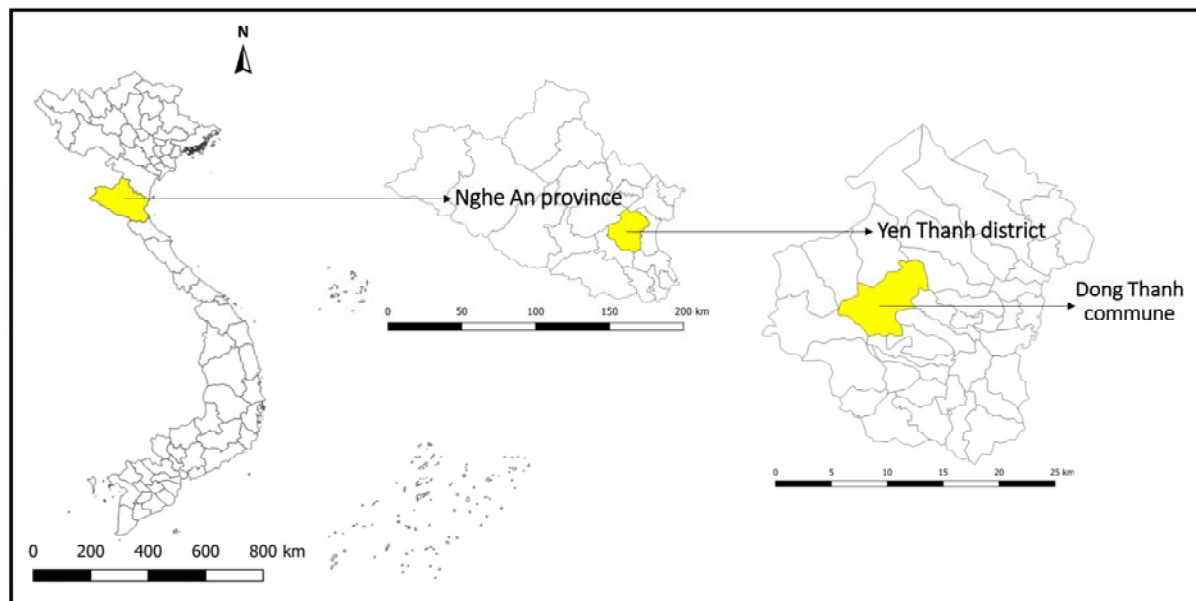

116

117 **Fig 1. Map of Vietnam showing the locations of Nghe An province, Yen Thanh district, and Dong Thanh**  
118 **commune.** The map was created using QGIS Desktop version 3.36.2 software

119

### 120 **2.3. Study design and data collection**

121 Between April and May 2022, a cross-sectional study was conducted to assess the current  
122 KAP related to fascioliasis within the Dong Thanh commune. This study was part of a multi-  
123 host study with the primary goal to estimate the prevalence of fascioliasis across all hosts in the  
124 life cycle. From a list with the commune's households provided by the local authorities,  
125 households with a minimum of three members were extracted from this list. Subsequently, a  
126 random sampling method was applied to this subset to select 621 households. During household  
127 visits, if more than three individuals were present, a maximum of three eligible individuals were  
128 randomly chosen to participate. In cases when the household comprised three or fewer  
129 individuals, all members were invited to participate. After the eligibility of the selected  
130 individuals was confirmed, written informed consent was sought for the selected adults, while  
131 for children aged 5 to 17, verbal assent combined with written informed consent from their  
132 parents or guardians was sought. All selected individuals were invited to participate in the  
133 individual questionnaire. The household questionnaire was specifically administered to the



134 household head or the member who possessed the most comprehensive knowledge of household  
135 activities. Finally, for all participants, general demographic details were collected including  
136 gender, age, occupation, education level, and marital status.

## 137 **2.4. Questionnaires**

138 The individual questionnaire consisted of three comprehensive sections, each designed to  
139 capture specific aspects of participants' KAP regarding fascioliasis. The first section contained  
140 questions on general demographic information, including age, gender, education level, and  
141 distance from the nearest health clinic. The second section focused on knowledge and awareness  
142 of fascioliasis, featuring questions on participants' familiarity with the disease, its symptoms,  
143 modes of transmission, and prevention strategies. The third section explored participants'  
144 attitudes and practices related to fascioliasis, including health-seeking behaviors, dietary habits,  
145 and the frequency of consuming raw vegetables. This section also included questions on  
146 healthcare access and reasons for not seeking formal medical treatment.

147 The household questionnaire was structured into four sections (**Info S1**). The first section  
148 collected demographic data, including age, gender, occupation, educational attainment, marital  
149 status, and participants' familiarity with fascioliasis. Additionally, the GPS coordinates of each  
150 household were recorded in this section. The second section encompassed 11 questions related  
151 to household water and sanitation practices. The third section, consisting of 15 questions,  
152 focused on livestock and crop management practices. The final section included 8 questions  
153 aimed at assessing culinary habits, specifically food preparation methods and the types of plants  
154 consumed.

155 Prior to field implementation, the research team received training on the questionnaire  
156 content, conducted pilot interviews among team members, and refined the questions to align  
157 with the local language, optimize interview duration, and enhance the clarity and

158 comprehensibility of the phrasing for the local population. Both questionnaires were generated  
159 in English and then translated into Vietnamese. The questions were completed by interviewers  
160 using a printed version. After the field data collection, the data were entered manually into the  
161 RedCap application [21, 22]. Templates of both questionnaires are provided in **Info S1**. All  
162 original data are available in **Info S2**.

## 163 **2.5. Statistical data analysis**

164 The data were exported from the RedCap application to an Excel file and consequently  
165 analysed by the statistical software R [23]. First, all responses were presented using descriptive  
166 statistics. Proportions were shown for categorical variables, whereas mean, median, and range  
167 were presented for continuous variables.

168 The study examined relationships between socio-demographic factors and responses from  
169 individual and household questionnaires. For each question, a new binary variable was created:  
170 responses indicating non-risky practices or correct knowledge scored 1, while risky practices or  
171 incorrect knowledge scored 0 (details in **Info S1**). New variables were created to sum up the 1s  
172 and 0s, resulting in a total score for individual practices, household practices, and individual  
173 knowledge separately.

174 Associations between socio-demographic variables (gender, age, education and  
175 employment) and individual practice, household practice, and individual knowledge scores were  
176 analysed. For individual scores, a generalized linear mixed model with household as a random  
177 factor was used. Household practice scores were analysed using a generalized linear model. The  
178 full model (i.e., with all the socio-demographic variables included as fixed effects) was  
179 simplified by iteratively removing the least significant variable, comparing Akaike's  
180 information criterion values to find the most parsimonious model. The significance level was set  
181 at 5%.

## 182 **3. Results**

### 183 **3.1. Community KAP of fascioliasis in north-central Vietnam**

#### 184 *3.1.1. Socio-demographic characteristics of individual participants*

185 A total of 1,398 individuals were included in the study, with a slight majority of males  
186 (55.22%, 770/1,398). The age of the participants ranged from 5 to 92 years, with a mean age of  
187 38 and a median age of 42. Farming was the predominant occupation, accounting for  
188 (828/1,397) of respondents. School children and students made up 26.77% (374/1,397) of the  
189 sample, while smaller proportions were workers (5.87%, 82/1,397) and government employees  
190 (3.44%, 47/1,397). In terms of education, most participants (53.86%, 753/1,398) had completed  
191 secondary school. Primary school education was the highest level achieved by 17.38%  
192 (243/1,398) of respondents, and 21.75% (304/1,398) had completed high school. A small  
193 percentage (5.22%, 73/1,398) had achieved a university degree, and a minority (1.79%,  
194 25/1,398) had not attended school.

#### 195 *3.1.2. Knowledge and attitudes on fascioliasis among individual participants*

196 Knowledge and awareness of fascioliasis among the participants were limited. An important  
197 majority (85.34%, 1,193/1,398) had never heard of fascioliasis, while only a small fraction  
198 (13.02%, 182/1398) recognized it as a disease affecting humans and livestock. Additionally,  
199 1.57% (22/1,398) of respondents were unsure. Only participants who had heard about the  
200 disease or were unsure were asked further knowledge questions. Most of these participants were  
201 aware that fascioliasis impacts the liver (77.07%, 158/205). They perceived fascioliasis as  
202 somewhat serious (69.95%, 142/203), both at a personal and national level (71.57%, 146/204).  
203 Commonly reported symptoms included abdominal pain (44.39%, 91/205) and fever (15.61%,  
204 23/205).

205 A total of 61.46% (126/205) correctly identified fascioliasis as a parasitic infection, and  
206 60.78% (124/204) understood that it is transmitted through contaminated plants or vegetables.  
207 Preventive measures noted included not eating raw water plants (42.44%, 87/205) and cooking  
208 vegetables (24.88%, 51/205). There was a strong belief (75.61%, 155/205) that anyone could be  
209 infected, and 78.54% (161/205) were aware that specific treatment from health centers could  
210 cure the disease. Information sources were primarily television (40.49%, 83/205) and health  
211 workers (33.66%, 69/205), while experience with the disease amongst direct contacts, such as  
212 neighbors (6.34%; 13/205) and were family members (1.95%; 4/205) were rare. Among 204  
213 respondents, 58.33% (119/204) believed they could contract fascioliasis, 6.37% (13/204)  
214 believed they could not, and 35.29% (72/204) were unsure. The majority of the 205 respondents  
215 reported that they would primarily feel afraid if given a potential diagnosis (83.90%; 172/205),  
216 followed by feeling normal (4.88%; 10/205), surprise (1.95%; 4/205), and sadness or  
217 hopelessness (0.49%; 1/205). None of the respondents indicated shame, and 8.78% (18/205)  
218 were uncertain about how they would react. More details on the study outcomes can be found in  
219 **Info S3**. Because of the low number of participants having responded to more than one  
220 knowledge questions (i.e. participants who had heard about fascioliasis), it was impossible to fit  
221 a model investigating the association between the socio-demographic characteristics and the  
222 individual knowledge scores.

### 223 *3.1.3. Practices on fascioliasis among individual participants*

224 **Table 1** summarizes the healthcare-seeking behavior among 1,398 respondents. A vast  
225 majority (95.85%; 1,340/1390) expressed their intention to use health facilities for general  
226 health problems, with a small fraction (3.29%; 46/1,398) preferring a pharmacy. A negligible  
227 percentage (0.14%; 2/1,398) opted to rest at home, while (3.29%; 46/1,398) of the respondents  
228 were uncertain about where they would seek treatment. The frequency of seeking health care  
229 was also examined; among 1,340 respondents, (84.55%; 1,133) sought health care at least once a

230 year. Of the 1,392 respondents, (90.88%; 1,265/1392) consumed specific vegetables (shown in  
 231 pictures), and of the 1,391 respondents, (83.47%; 1,161/1391) indicated they prepare these  
 232 plants at home. Among 1,168 respondents, (89.81%; 1,049/1,168) consumed raw lettuce, and  
 233 56.59% (661/1,168) consumed raw fish mint. Moreover, 60.96% (712/1,168) of these  
 234 respondents indicated they consume these plants at least once a week. Regarding herbal drink  
 235 consumption, out of 1,398 respondents, 45.70% (639/1,398) consumed green tea or herbal tea,  
 236 while 53.29% (745/1,398) did not consume any herbal drinks. Additionally, only 3.22%  
 237 (45/1,398) of respondents chewed leaves, grass, or other plants found outdoors. When  
 238 investigating the association between the individual practice scores and the socio-demographic  
 239 variables, the model containing only gender was best explained the data, with male participants  
 240 having lower odds for a 1 score, indicating more risky practices, as compared to female  
 241 participants (odds ratio (OR): 0.696; 95% confidence interval (95%CI): (0.591-0.819)).

242 **Table 1. Practices related to fascioliasis among the household participants in Dong Thanh commune.**

| Question                                                                                         | n<br>(multiple answers possible) | % n   |
|--------------------------------------------------------------------------------------------------|----------------------------------|-------|
| Do you consume one of these plants? (The participants were shown in pictures in <b>Info S4</b> ) | N = 1,392                        |       |
| Yes                                                                                              | 1,265                            | 90.88 |
| No                                                                                               | 101                              | 7.26  |
| Don't know                                                                                       | 26                               | 1.87  |
| Which of the following plants do you consume raw?                                                | N = 1,168                        |       |
| Water spinach, water morning glory                                                               | 75                               | 6.42  |
| Water cress                                                                                      | 18                               | 1.54  |
| Rice Paddy Herb                                                                                  | 118                              | 10.10 |
| Lettuce                                                                                          | 1,049                            | 89.81 |
| Sweet Cabbage                                                                                    | 40                               | 3.42  |
| Lotus                                                                                            | 5                                | 0.43  |
| Fish mint, lettuce mint                                                                          | 661                              | 56.59 |
| Water dropwort                                                                                   | 16                               | 1.37  |
| Other non-water plant                                                                            | 88                               | 7.53  |
| Other                                                                                            | 0                                | 0.00  |
| I don't consume raw plants/vegetables                                                            | 77                               | 6.59  |
| Don't know                                                                                       | 8                                | 0.68  |
| If you consume these raw, how often? (last year)                                                 | N = 1,168                        |       |
| Daily                                                                                            | 22                               | 1.88  |
| At least once a week                                                                             | 690                              | 59.08 |
| At least once a month                                                                            | 335                              | 28.68 |
| At least once a year                                                                             | 41                               | 3.51  |
| Don't know                                                                                       | 32                               | 2.74  |

|                                                                             |           |       |
|-----------------------------------------------------------------------------|-----------|-------|
| If you prepare these at home (either raw or cooked), how often? (last year) | N = 1,168 |       |
| Daily                                                                       | 395       | 33.82 |
| At least once a week                                                        | 473       | 40.50 |
| At least once a month                                                       | 228       | 19.52 |
| At least once a year                                                        | 32        | 2.74  |
| Don't know                                                                  | 38        | 3.25  |
| Where do you mainly consume these plants?                                   | N = 1,168 |       |
| At home                                                                     | 1,119     | 95.80 |
| At home of other people in same village                                     | 5         | 0.43  |
| At home of other people in different village                                | 1         | 0.09  |
| At the market                                                               | 44        | 3.77  |
| In a restaurant                                                             | 6         | 0.51  |
| Other                                                                       | 0         | 0.00  |
| Don't know                                                                  | 12        | 1.03  |
| Do you ever consume herbal drinks?                                          | N = 1,398 |       |
| Yes, tea                                                                    | 636       | 45.49 |
| Yes, others                                                                 | 3         | 0.21  |
| No                                                                          | 745       | 53.29 |
| Don't know                                                                  | 15        | 1.07  |

243

## 244 **3.2. Household practices relating to fasciolosis in north-central, Vietnam**

### 245 *3.2.1. Socio-demographic characteristics of household participants*

246 A total of 621 individuals were interviewed about their household practices. Of the 620  
 247 respondents, 64.68% (401/620) were household heads, while 35.32% (219/620) were other  
 248 household members. The gender distribution among the 621 participants was nearly balanced,  
 249 with 50.89% (316/621) being male. The age of the participants ranged from 17 to 92 years with  
 250 a mean of 50 and median age of 52 years. Farming was the primary occupation, representing  
 251 84.68% (525/620) of the surveyed individuals. Other occupations included workers (6.94%;  
 252 43/620), civil servants or government cadres (3.87%; 24/620), others (4.52%; 28/620), and  
 253 miscellaneous professions (3.87%). Among the 621 individuals surveyed, education levels  
 254 varied, ranging from no formal schooling (0.48%; 3/621) to university training (4.67%; 29/621).  
 255 The largest group (65.70%; 408/621) had completed secondary school, followed by high school  
 256 graduates (26.09%; 162/621), while 3.06% (19/621) had finished primary education.

257 3.2.2. *Water and sanitation practices in households*

258 Water and sanitation practices are described in **Table 2**. Households primarily relied on tube  
 259 wells/boreholes (241/621 households, 38.81%) and rainwater collection (239/621 households,  
 260 38.49%) for their drinking water, while tube wells/boreholes (339/621 households, 54.59%) and  
 261 protected dug wells (234/621 households, 37.68%) were water sources used for other purposes  
 262 in the households. Nearly all households (613/619 households, 98.71%) treated their drinking  
 263 water, with the majority using filters or water machines (501/615 households, 81.46%). Most  
 264 households (450/621 households, 72.46%) had access to flush/pour flush toilets, and the  
 265 wastewater was predominantly managed through septic tanks (454/619 households, 73.34%).  
 266 Additionally, a vast majority of households (609/617 households, 98.70%) had private toilet  
 267 facilities.

268 **Table 2. Household water and sanitation practices in Dong Thanh commune.**

| Question                                                                                                                     | n<br>(multiple<br>answers<br>possible) | % n   |
|------------------------------------------------------------------------------------------------------------------------------|----------------------------------------|-------|
| What is the source of drinking water for members of your household?                                                          | N = 621                                |       |
| Piped water into dwelling                                                                                                    | 1                                      | 0.16  |
| Tube well/borehole                                                                                                           | 241                                    | 38.81 |
| Protected dug well                                                                                                           | 171                                    | 27.54 |
| Rainwater collection                                                                                                         | 239                                    | 38.49 |
| Bottled water                                                                                                                | 0                                      | 0.00  |
| Surface water                                                                                                                | 5                                      | 0.81  |
| Other                                                                                                                        | 0                                      | 0.00  |
|                                                                                                                              |                                        | 0.00  |
| What is the source of water used by your household for other purposes, such as washing vegetables, cooking and hand washing? | N = 621                                |       |
| Piped water into dwelling                                                                                                    | 0                                      | 0.00  |
| Tube well/ borehole                                                                                                          | 339                                    | 54.59 |
| Protected dug well                                                                                                           | 234                                    | 37.68 |
| Rainwater collection                                                                                                         | 59                                     | 9.50  |
| Bottled water                                                                                                                | 2                                      | 0.32  |
| Surface water                                                                                                                | 5                                      | 0.81  |
| Other                                                                                                                        | 0                                      | 0.00  |
| Don't know                                                                                                                   | 0                                      | 0.00  |
| Do you treat your water in any way to make it safer to drink?                                                                | N = 619                                |       |
| Yes                                                                                                                          | 613                                    | 98.71 |
| No                                                                                                                           | 6                                      | 0.97  |
| Don't know                                                                                                                   | 0                                      | 0.00  |
| How do you treat the water to make it safer to drink?                                                                        | N = 615                                |       |
| Boil                                                                                                                         | 115                                    | 18.70 |

|                                                                |         |       |
|----------------------------------------------------------------|---------|-------|
| Using a chemical                                               | 0       | 0.00  |
| Use filter, water machine                                      | 501     | 81.46 |
| Use ceramic filter                                             | 37      | 6.02  |
| Let it stand and settle                                        | 1       | 0.16  |
| Don't know                                                     | 0       | 0.00  |
| Other                                                          | 0       | 0.00  |
| What kind of toilet facility do members of your household use? | N = 621 |       |
| Flush / pour flush                                             | 450     | 72.46 |
| Composting toilet (single tank)                                | 19      | 3.06  |
| Composting toilet (double tank)                                | 134     | 21.58 |
| Hanging toilet                                                 | 0       | 0.00  |
| Dug pit latrine                                                | 18      | 2.90  |
| Bush or field                                                  | 1       | 0.16  |
| No toilet                                                      | 1       | 0.16  |
| Where does wastewater from your toilet go? (two missing)       | N = 619 |       |
| Piped sewer system                                             | 29      | 4.68  |
| Septic tank                                                    | 454     | 73.34 |
| Pond/lake/canal                                                | 7       | 1.13  |
| Composting latrine                                             | 122     | 19.71 |
| Other                                                          | 2       | 0.32  |
| Don't know                                                     | 1       | 0.16  |
| Is the toilet facility shared with other households?           | N = 617 |       |
| Yes                                                            | 7       | 1.13  |
| No                                                             | 609     | 98.70 |
| Don't know                                                     | 1       | 0.16  |

269

270 Related to livestock and crop management (**Table 3**), most households (588/621  
271 households, 94.69%) owned agricultural parcels, with a significant portion (411/585 households,  
272 70.26%) being actively engaged in farming activities. These parcels were predominantly used  
273 for crop cultivation, particularly rice, which was the primary crop for most households (565/587  
274 households, 96.25%). Livestock ownership was prevalent, with 567/584 households (96.40%)  
275 owning livestock. In terms of livestock interactions with water bodies used for vegetable  
276 cultivation, 40/567 respondents (7.05%) reported that their livestock frequently accessed these  
277 areas, while 107/567 (18.87%) indicated occasional access. Conversely, 281/567 respondents  
278 (49.56%) stated that their livestock never came into contact with such water bodies.  
279 Furthermore, 139/567 respondents (24.51%) were uncertain about their livestock's interaction  
280 with these water sources. Among these, 119/567 households (20.99%) owned cattle, and 78/567  
281 households (13.75%) owned buffalo. Manure was commonly utilized as fertilizer (395/588  
282 households, 67.18%), with composting being the preferred treatment method of animal feces



283 (388/395 households, 98.23% of those using manure). Pesticide use was widespread among  
 284 households (469/587 households, 79.90%), indicating a reliance on chemical inputs for crop  
 285 management.

286 **Table 3. Crop and livestock management practices of households in the Dong Thanh commune.**

| Question                                                                                              | n (multiple answers possible) | % n   |
|-------------------------------------------------------------------------------------------------------|-------------------------------|-------|
| What are the feed sources for your livestock?                                                         | N = 573                       |       |
| Cut and carry, grown in or near waterbodies                                                           | 29                            | 5.06  |
| Cut and carry, grown elsewhere                                                                        | 93                            | 16.23 |
| Tethering                                                                                             | 23                            | 4.01  |
| Factory product                                                                                       | 93                            | 16.23 |
| Free roaming/grazing in or near waterbodies                                                           | 3                             | 0.52  |
| Free roaming/ grazing elsewhere                                                                       | 17                            | 2.97  |
| Other processed feed source                                                                           | 330                           | 57.59 |
| Other                                                                                                 | 2                             | 0.35  |
| Don't know                                                                                            | 6                             | 1.05  |
| Do your livestock come in or near waterbodies where vegetables for human consumption are being grown? | N = 567                       |       |
| Often                                                                                                 | 40                            | 7.05  |
| Sometimes                                                                                             | 107                           | 18.87 |
| Never                                                                                                 | 281                           | 49.56 |
| Don't know                                                                                            | 139                           | 24.51 |
| Does your livestock come in or near water supply for crop water irrigation?                           | N = 567                       |       |
| Often                                                                                                 | 12                            | 2.12  |
| Sometimes                                                                                             | 184                           | 32.45 |
| Never                                                                                                 | 233                           | 41.09 |
| Don't know                                                                                            | 138                           | 24.34 |
| What is the source of drinking-water for your livestock?                                              | N = 573                       |       |
| Piped water into dwelling                                                                             | 1                             | 0.17  |
| Tube well/ borehole                                                                                   | 297                           | 51.83 |
| Protected dug well                                                                                    | 201                           | 35.08 |
| Rainwater collection                                                                                  | 47                            | 8.20  |
| Surface water                                                                                         | 14                            | 2.44  |
| Other                                                                                                 | 0                             | 0.00  |
| Don't know                                                                                            | 15                            | 2.62  |
| Do you use manure of cattle/buffalo/goat/horse/pig/human as fertilizer of your parcel?                | N = 588                       |       |
| Yes                                                                                                   | 395                           | 67.18 |
| No                                                                                                    | 191                           | 32.48 |
| Don't know                                                                                            | 2                             | 0.34  |
| How do you treat manure before the use as fertiliser?                                                 | N = 395                       |       |
| No treatment                                                                                          | 7                             | 1.77  |
| Composting before use                                                                                 | 388                           | 98.23 |
| Don't know                                                                                            | 0                             | 0.00  |
| Others                                                                                                | 0                             | 0.00  |
| Did you use pesticides on your parcel the last year?                                                  | N = 587                       |       |
| Yes                                                                                                   | 469                           | 79.90 |
| No                                                                                                    | 56                            | 9.54  |
| Don't know                                                                                            | 62                            | 10.56 |

287

288 **Table 4** illustrates the culinary practices among households in the Dong Thanh commune.

289 Most households engaged in the consumption and preparation of various plants. Nearly all  
 290 households (98.06%; 608/620) consumed these plants, and an equal percentage prepare them at  
 291 home. Commonly consumed raw plants included lettuce (92.07%; 569/617), fish mint/lettuce  
 292 mint (64.56%; 399/617), and rice paddy herb (13.43%; 83/617), while the most frequently  
 293 cooked plants were water spinach/water morning glory (95.30%; 588/617) and sweet cabbage  
 294 (85.58%; 528/617). Washing practices were prevalent, with 99.67% (616/617) of households  
 295 washing these plants before use, primarily with water alone (59.48%; 367/617) or with water  
 296 and salt (40.52%; 250/617). Only (1.3%; 8/617) washed the plants with vinegar and water. Most  
 297 households (84.60%; 522/617) obtained these plants from their own parcels, while a smaller  
 298 percentage (17.50%; 108/617) purchased them from local markets (more details can be found in  
 299 the **Info S3**). None of the investigated socio-demographic variables was found to be  
 300 significantly associated with the household practice scores.

301 **Table 4. Culinary practices among the households in the Dong Thanh commune**

| Question                                                                                                                                   | n<br>(multiple answers possible) | % n   |
|--------------------------------------------------------------------------------------------------------------------------------------------|----------------------------------|-------|
| Does your household consume one of these plants? (pictures of vegetables are shown, see <b>Info S4</b> )                                   | N = 620                          |       |
| Yes                                                                                                                                        | 608                              | 98.06 |
| No                                                                                                                                         | 12                               | 1.94  |
| Don't know                                                                                                                                 | 0                                | 0.00  |
| Does your household prepare one of these plants at home? Is it either raw or cooked? (pictures of vegetables are shown in <b>Info S4</b> ) | N = 618                          |       |
| Yes                                                                                                                                        | 606                              | 98.06 |
| No                                                                                                                                         | 12                               | 1.94  |
| Don't know                                                                                                                                 | 0                                | 0.00  |
| Does your household wash these plants before use?                                                                                          | N = 610                          |       |
| Yes                                                                                                                                        | 608                              | 99.67 |
| No                                                                                                                                         | 2                                | 0.33  |
| Don't know                                                                                                                                 | 0                                | 0.00  |
| How does your household wash these plants?                                                                                                 | N = 617                          |       |
| With water                                                                                                                                 | 367                              | 59.48 |
| With water, and vinegar                                                                                                                    | 8                                | 1.30  |
| With water, and salt                                                                                                                       | 250                              | 40.52 |
| Other                                                                                                                                      | 0                                | 0.00  |

|                                                 |         |       |
|-------------------------------------------------|---------|-------|
| Don't know                                      | 1       | 0.16  |
| Where does your households obtain these plants? | N = 617 |       |
| Local market                                    | 108     | 17.50 |
| Cultivated from own parcel                      | 522     | 84.60 |
| Cultivated from another parcel                  | 2       | 0.32  |
| Supermarket                                     | 0       | 0.00  |
| Restaurant                                      | 0       | 0.00  |
| Other/Do not know                               | 0       | 0.00  |

302

303

## 304 **4. Discussion**

305 Fascioliasis, caused by *F. hepatica* and *F. gigantica*, significantly impacts the health of  
306 both humans and animals, mainly as the result of liver damage. This study provides crucial  
307 insights into the KAP related to fascioliasis among residents of a rural community in the north-  
308 central coast region of Vietnam.

### 309 **Lack of knowledge about fascioliasis**

310 A substantial knowledge deficit regarding fascioliasis was revealed in our study, with  
311 about 85.34% of participants indicating no prior awareness of the disease. This awareness level  
312 is considerably lower compared to findings from other regions. For example, a study in northern  
313 Vietnam reported that only 11.50% of participants had never heard of liver fluke [13], consistent  
314 with results from Central Vietnam [17, 24, 25]. Another study by Lugong et al., (2024) in the  
315 Philippines reported a higher level of awareness, with 81.62% of participants indicating they had  
316 heard of fascioliasis [26]. A detailed understanding of fascioliasis's transmission, symptoms, and  
317 prevention among our respondents was notably deficient. This aligns with findings from regions  
318 where fascioliasis was prevalent but underreported, indicating a global need for enhanced public  
319 health education [1].

### 320 **Common practices of consuming raw vegetables and misconceptions about safe** 321 **handling practices**

322 Our study reveals that the consumption of raw vegetables was frequently practiced within  
323 the community. Of the 1,168 respondents, 1,083 (92.72%) indicated consumption of at least one  
324 type of raw vegetable. Additionally, 712 participants (61.82%) noted consuming raw vegetables  
325 at a minimum frequency of once per week. These findings align with a study by Phi et al. in  
326 northern Vietnam, where 91.2% reported consuming raw vegetables [13]. Conversely, Quy et

327 al.'s research found lower rates in central Vietnam, with consumption ranging from 28.20% to  
328 33.80% [17].

329 In Vietnam, there is a common belief that washing raw vegetables with clean water or  
330 soaking them in a saltwater or vinegar solution after washing, makes them safe to eat. Our  
331 results showed that 99.84% of households wash vegetables, 59.48% using water, 40.52%  
332 saltwater, and 1.30% vinegar water. However, Phuong's study demonstrated that washing  
333 vegetables, whether by rinsing them under running water or scrubbing them by hand, was  
334 largely ineffective at removing metacercariae, with less than 2% of the larvae being detached.  
335 Additionally, exposure to a 5% acetic acid solution, comparable to commercial vinegar, resulted  
336 in 93.60% to 96.00% of metacercariae surviving after less than 20 minutes of treatment.  
337 Similarly, soaking vegetables in saltwater for less than 20 minutes failed to effectively kill or  
338 detach the metacercariae [27]. These findings are further corroborated by Hassan et al. (2008),  
339 who reported that acetic acid solutions below 5% were ineffective at killing *Fasciola*  
340 metacercariae, even after 30 minutes of exposure [28].

#### 341 **Modifying livestock and crop farming practices to reduce fascioliasis transmission**

342 During the KAP study, we concurrently investigated the prevalence of *Fasciola* infection  
343 in hosts within the same area. The results revealed a notable discrepancy: animal (buffalo and  
344 cattle) infection rates were 51.52% by copro-microscopy and 54.12% by antibody ELISA, while  
345 human infection rates were 0% by copro-microscopy and only 0.07% by antibody ELISA [6]. At  
346 the same time, this KAP study showed that conditions appear highly conducive to the potential  
347 transmission of *Fasciola*. Indeed, this is due to the widespread practice of free-grazing buffalo  
348 and cattle in the commune, and people frequently consume raw vegetables, including aquatic  
349 plants.

350 This low infection rate in humans could be explained by several key observations. Firstly,  
351 among the raw vegetables consumed, non-aquatic varieties such as lettuce (92.07%) and herbs  
352 (64.56%) were the most preferred. Secondly, 84.60% of the vegetables consumed were sourced  
353 from household gardens, which included some aquatic plants like fish mint, morning glory, and  
354 rice paddy herb. Additionally, households primarily used agricultural land (including submerged  
355 land) for rice cultivation (96.25%), with significant portions also allocated to corn (30.66%) and  
356 potatoes/sweet potatoes (14.65%). Only a small fraction (3.24%) of the land was dedicated to  
357 the cultivation of aquatic vegetables. Furthermore, the study found that out of 395 households  
358 using livestock manure in agriculture, 388 households (98.23%) composted the manure before  
359 use. In Dong Thanh commune, animal manure is typically collected and piled for 3 to 6 months  
360 before being used in agriculture. Composting livestock manure before use helps reduce the risk  
361 of *Fasciola* transmission. A study by Moazeni et al. (2010) demonstrated that composting at  
362 high temperatures and for a sufficient duration effectively inactivates *Fasciola* eggs and reduces  
363 the formation of miracidia [29].

364 The infection rate of *Fasciola* in the livestock population remains very high, exceeding  
365 50%. This can be attributed to the practice of free grazing of livestock near agricultural fields,  
366 which is a significant risk factor for *Fasciola* transmission. Free grazing allows cattle to  
367 consume contaminated water and aquatic plants, simultaneously dispersing feces into the  
368 agriculture fields. This aligns with previous research by Nguyen et al., which indicated a high  
369 risk of infection in livestock due to extensive grazing practices [16].

370 In general, the practices observed in Dong Thanh commune appear to present significant  
371 risks for fascioliasis transmission, particularly due to the high prevalence of infection in  
372 livestock, widespread free-grazing, and the consumption of raw vegetables. Combined with the  
373 low level of knowledge about the disease, this creates an apparently "dangerous" situation.  
374 However, the accompanying prevalence study shows that human infection rates remain very low

375 [30], suggesting that transmission to humans is occurring at a minimal level. Upon closer  
376 examination, certain practices, such as the composting of livestock manure, may play a role in  
377 reducing the survival of *Fasciola* eggs and limiting transmission risks. Additionally, the practice  
378 of growing vegetables in household gardens, with a preference for non-aquatic varieties, may  
379 further mitigate potential exposure. Nonetheless, further research is required to gain deeper  
380 insights into the specific factors that influence the transmission dynamics and to determine  
381 which practices are most effective in reducing the risk of fascioliasis transmission to humans.

## 382 **Conclusion**

383 This study reveals significant gaps in KAP related to fascioliasis among residents of Dong  
384 Thanh commune, highlighting a substantial lack of awareness. Risky behaviors, such as the  
385 frequent consumption of raw vegetables in humans, and free grazing of animals in fields, are  
386 prevalent. Although the current prevalence in humans in the area is reported to be low, it is key  
387 to stay alert about the potential for transmission, suggesting that certain practices, such as  
388 manure composting and the preference for non-aquatic vegetables, may help mitigate  
389 transmission. To reduce the risk of fascioliasis transmission, targeted interventions are required.  
390 These should include educational programs aimed at raising community awareness about the  
391 disease and promoting safer practices in livestock management and vegetable consumption. The  
392 role of household gardens in limiting exposure should also be emphasized, alongside improved  
393 composting techniques to ensure the inactivation of *Fasciola* eggs. It is essential to incorporate  
394 gender-specific strategies and community involvement to enhance the effectiveness of these  
395 interventions. Further investigations should elucidate the factors hampering transmission to  
396 humans.

## 397 **5. Acknowledgments**

398 This research was funded by the EmFaVie project, supported by the Flemish  
399 Interuniversity Council - University Development Cooperation (VLIR-UOS, grant  
400 VN2020SIN317A103 to BL and DDT), and the FasciCoM project, jointly financed by the  
401 Research Foundation - Flanders (FWO, grant G0E2921N to BL) and the Vietnamese National  
402 Foundation for Science and Technology Development (NAFOSTED, grant FWO.108.2020.01  
403 to DDT). The funders had no role in the study's design, data collection, analysis, publication  
404 decisions, or manuscript preparation. We extend our gratitude to the study participants, the  
405 dedicated field team members Nguyen Huu Truong, and Dinh Cong Think, and the support from  
406 the Nghe An Province Center for Disease Control, Yen Thanh Health District Center, and Dong  
407 Thanh commune health stations.

## 408 **6. References**

- 409 1. Mas-Coma S, Bargues MD, Valero MA. Fascioliasis and other plant-borne trematode  
410 zoonoses. *International Journal for Parasitology*. 2005;35(11):1255-78. doi:  
411 <https://doi.org/10.1016/j.ijpara.2005.07.010>.
- 412 2. Charlier J, Duchateau L, Claerebout E, Williams D, Vercruyse J. Associations between  
413 anti-*Fasciola hepatica* antibody levels in bulk-tank milk samples and production parameters  
414 in dairy herds. *Preventive Veterinary Medicine*. 2007;78(1):57-66. doi:  
415 <https://doi.org/10.1016/j.prevetmed.2006.09.010>.
- 416 3. Schweizer G, Braun U, Deplazes P, Torgerson PR. Estimating the financial losses due to  
417 bovine fasciolosis in Switzerland. *Veterinary Record*. 2005;157(7):188-93.
- 418 4. Rioux MC, Carmona C, Acosta D, Ward B, Ndao M, Gibbs BF, et al. Discovery and  
419 validation of serum biomarkers expressed over the first twelve weeks of *Fasciola hepatica*  
420 infection in sheep. *International Journal for Parasitology*. 2008;38(1):123-36. doi:  
421 <https://doi.org/10.1016/j.ijpara.2007.07.017>.
- 422 5. Copeman D, Copland R, Gray GD. Overcoming liver fluke as a constraint to ruminant  
423 production in South-East Asia: Australian Centre for International Agricultural Research;  
424 2008.
- 425 6. Mas-Coma S. Epidemiology of fascioliasis in human endemic areas. *Journal of*  
426 *helminthology*. 2005;79(3):207-16.
- 427 7. Mas-Coma S. The importance of emerging and re-emerging zoonotic diseases: recognition,  
428 monitoring and control. Edited by NE Odongo, M Garcia & GJ Viljoen. 2010:277.
- 429 8. Nyindo M, Lukambagire A-H. Fascioliasis: An Ongoing Zoonotic Trematode Infection.  
430 *BioMed Research International*. 2015;2015:1-8. doi: 10.1155/2015/786195.



- 431 9. Fürst T, Keiser J, Utzinger J. Global burden of human food-borne trematodiasis: a  
432 systematic review and meta-analysis. *The Lancet Infectious Diseases*. 2012;12(3):210-21.  
433 doi: [10.1016/S1473-3099\(11\)70294-8](https://doi.org/10.1016/S1473-3099(11)70294-8).
- 434 10. Cwiklinski K, O'Neill S, Donnelly S, Dalton J. A prospective view of animal and human  
435 Fasciolosis. *Parasite immunology*. 2016;38(9):558-68.
- 436 11. Bui TD, Doanh PN, Saegerman C, Losson B. Current status of fasciolosis in Vietnam: an  
437 update and perspectives. *Journal of Helminthology*. 2016;90(5):511-22. Epub 2015/11/13.  
438 doi: [10.1017/S0022149X15000929](https://doi.org/10.1017/S0022149X15000929).
- 439 12. De NV, Minh PN, Le TH, Dung DT, Duong TT, Tuan BV, et al. A multidisciplinary  
440 analysis of over 53,000 fascioliasis patients along the 1995–2019 countrywide spread in  
441 Vietnam defines a new epidemiological baseline for One Health approaches. *One Health*.  
442 2024;19:100869. doi: <https://doi.org/10.1016/j.onehlt.2024.100869>.
- 443 13. Phi NTT, Nguyen TTB, Le TTH, Do DT, Lenaerts M, Losson B, et al. Foodborne zoonotic  
444 trematode infections in Yen Bai, Vietnam: a situational analysis on knowledge, attitude, and  
445 practice (KAP) and risk behaviors. *J Prev Med Hyg*. 2022;63(2):E310-e9. Epub 20220731.  
446 doi: [10.15167/2421-4248/jpmh2022.63.2.2104](https://doi.org/10.15167/2421-4248/jpmh2022.63.2.2104). PubMed PMID: 35968061; PubMed  
447 Central PMCID: PMCPMC9351405.
- 448 14. Office GS. Statistical summary book of Vietnam. Statistical Publishing House 2020. 313 p.
- 449 15. Geurden T, Somers R, Thanh NTG, Vien LV, Nga VT, Giang HH, et al. Parasitic infections  
450 in dairy cattle around Hanoi, northern Vietnam. *Veterinary Parasitology*. 2008;153(3):384-  
451 8. doi: <https://doi.org/10.1016/j.vetpar.2008.01.031>.
- 452 16. Lan Anh NT, Thanh DTH, Hoan DH, Thuy DT, Khong NV, Anderson N. The transmission  
453 of *Fasciola* spp. to cattle and contamination of grazing areas with *Fasciola* eggs in the Red  
454 River Delta region of Vietnam. *Tropical Animal Health and Production*. 2014;46(4):691-6.  
455 doi: [10.1007/s11250-014-0542-4](https://doi.org/10.1007/s11250-014-0542-4).
- 456 17. Quy T, Yeatman H, Flood VM, Chuong N, Tuan B. Prevalence and risks of fascioliasis  
457 among adult cohorts in Binh Dinh and Quang Ngai provinces-central Viet Nam. 2015.
- 458 18. Sazmand A, Alipoor G, Zafari S, Zolhavarieh SM, Alanazi AD, Sargison ND. Assessment  
459 of knowledge, attitudes and practices relating to parasitic diseases and anthelmintic  
460 resistance among livestock farmers in Hamedan, Iran. *Frontiers in veterinary science*.  
461 2020;7:584323.
- 462 19. Nguyen TGT, Le TH, Dao THT, Tran TLH, Praet N, Speybroeck N, et al. Bovine  
463 fasciolosis in the human fasciolosis hyperendemic Binh Dinh province in Central Vietnam.  
464 *Acta Tropica*. 2011;117(1):19-22. doi: <https://doi.org/10.1016/j.actatropica.2010.09.003>.
- 465 20. Francisco I, Jiz M, Rosenbaum M, Baltazar P, Steele JA. Knowledge, attitudes and  
466 practices related to schistosomiasis transmission and control in Leyte, Philippines. *PLOS*  
467 *Neglected Tropical Diseases*. 2019;13(5):e0007358. doi: [10.1371/journal.pntd.0007358](https://doi.org/10.1371/journal.pntd.0007358).
- 468 21. Harris PA, Taylor R, Thielke R, Payne J, Gonzalez N, Conde JG. A metadata-driven  
469 methodology and workflow process for providing translational research informatics support.  
470 *J Biomed Inform*. 2009;42(2):377-81.
- 471 22. Harris PA, Taylor R, Minor BL, Elliott V, Fernandez M, O'Neal L, et al. The REDCap  
472 consortium: building an international community of software platform partners. *Journal of*  
473 *biomedical informatics*. 2019;95:103208.
- 474 23. Chongsuvivatwong V. epiDisplay: epidemiological data display package. R package  
475 version. 2018;3(0.1):2018.
- 476 24. Nguyen V, Nguyen V, Bui V, Tran M. Trial model of fascioliasis control in two communes  
477 of Phu Cat district, Binh Dinh province. *Vietnam Journal of Practical Medicine*.  
478 2011;796:152-6.

- 479 25. Nguyen TH. Study on some characteristics and treatment effectiveness of fascioliasis with  
480 triclabendazole in Tinh Ky and Nghia Son communes, Quang Ngai province. National  
481 Institute of Malariology □ Parasitology and Entomology: Ha Noi 2012:p. 163.
- 482 26. Lugong R, Nicolas K, Bermudez J. Knowledge, attitude and practices of small-hold cattle  
483 and carabao owners towards fasciolosis in Northeastern Luzon, Philippines.
- 484 27. Nguyen Thi Xuan P. Foodborne zoonotic trematode infections and integrated control in  
485 Vietnam: Aspects related to snails and vegetables 2022.
- 486 28. Hassan AAA, Shoukary NM, El-Motayam M, Morsy ATA. Efficacy of five chemicals on  
487 *Fasciola gigantica* encysted metacercariae infectivity. J Egypt Soc Parasitol.  
488 2008;38(3):919-28. PubMed PMID: 19209774.
- 489 29. Moazeni M, Ansari-Lari M, Masoodfar M, Hosseinzadeh S, Mootabi Alavi A. Lethal effect  
490 of high temperatures on the eggs of *Fasciola hepatica*. Iranian Journal of Veterinary  
491 Research. 2010;11(2):168-73.
- 492 30. Hoang VQ, Dermauw V, Do DT, Vu BTL, Nguyen HTT, Nguyen HN, et al. Prevalence and  
493 risk factors related to *Fasciola* spp. transmission in Northern Vietnam: A cross-sectional  
494 study in multiple hosts. medRxiv. 2024:2024.07. 10.24310192.

495

## 496 7. Supplementary Files

497 **Info S1** Individual and Household Questionnaires

498 **Info S2** Original data

499 **Info S3** Data analysis results

500 **Info S4** Vegetable pictures

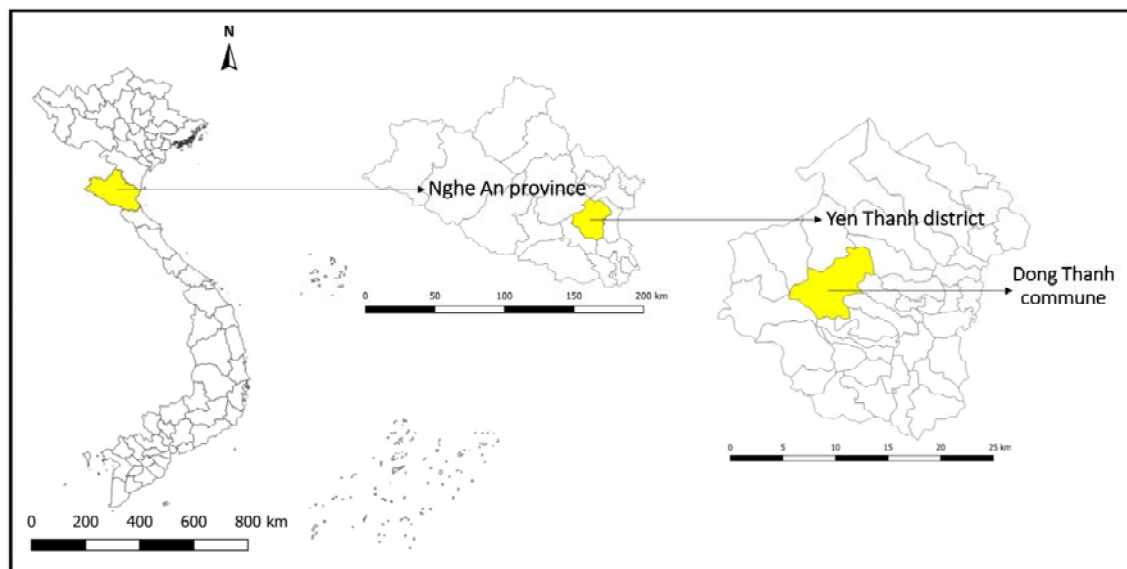

Source: https://medrxiv.org/content/10.1101/2024.11.04.24316254.full.pdf
