# Supplementary material for: Fascioliasis in north-central Vietnam: assessing community knowledge, attitudes, and practices
Source: bioRxiv or medRxiv preprint supplement (doi:10.1101/2024.11.04.24316254), 2024-11-04
Supplement: Supplementary file [file media-3.pdf]

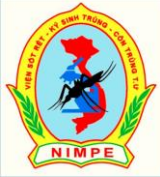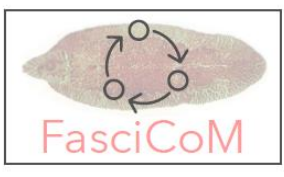

# Water plants

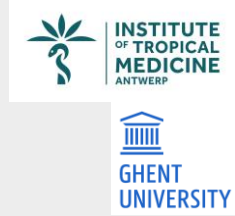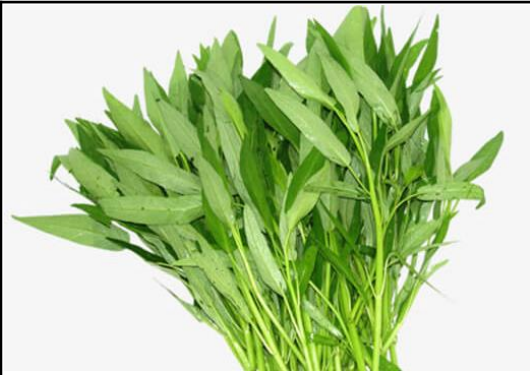

Water spinach, water morning glory

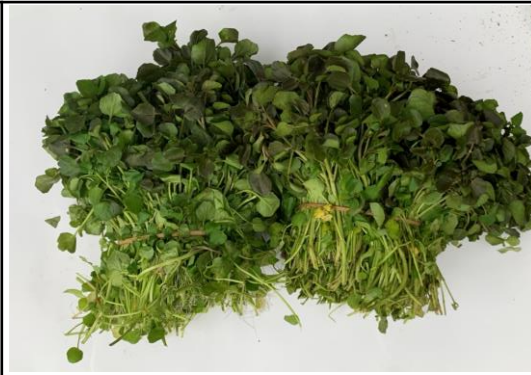

Water cress

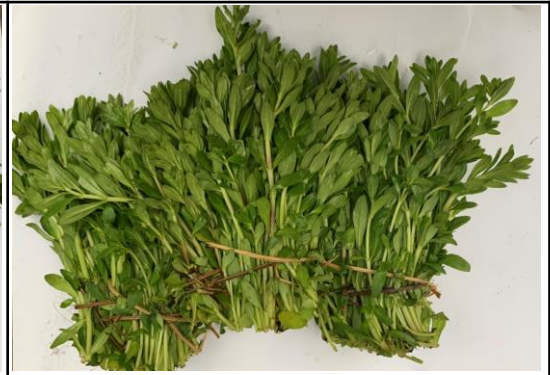

Cilantro

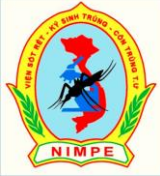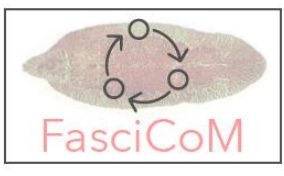

# Water plants

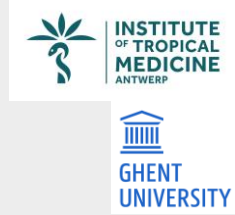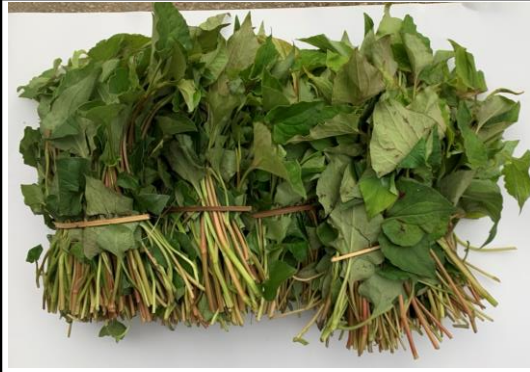

Fish mint, lettuce mint

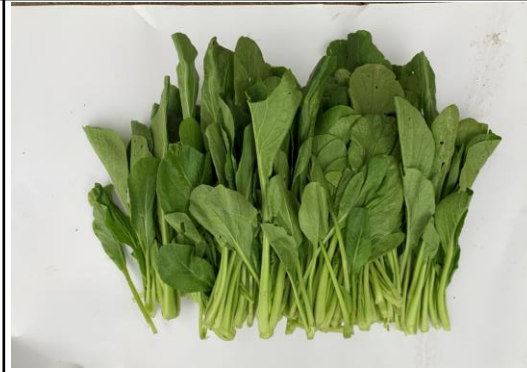

Sweet cabbage

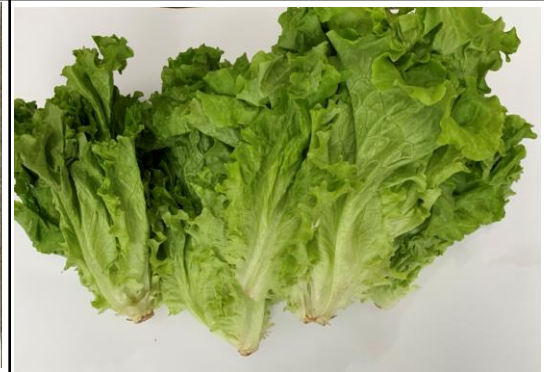

Salad



# Water plants

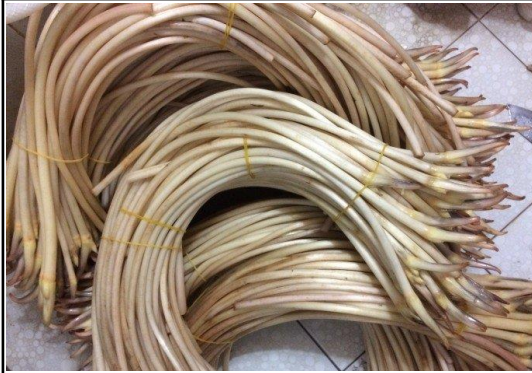

Lotus

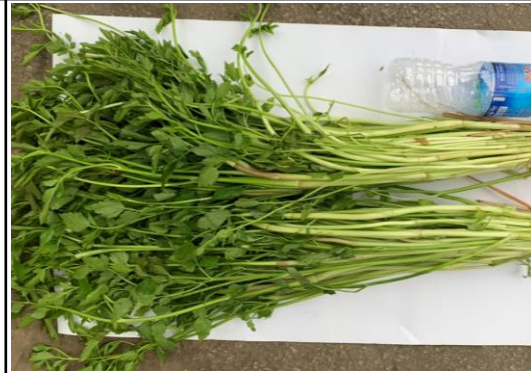

Celery
